# Supplementary material for: Development of a short-form Swedish version of the Montreal Cognitive Assessment (s-MoCA-SWE): protocol for a cross-sectional study
Source: HighWire-hosted journal article supplement (doi:10.1136/bmjopen-2021-049035), 2021-05-01
Supplement: bmjopen-2021-049035supp001_data_supplement.pdf [file bmjopen-2021-049035supp001_data_supplement.pdf]

## Supplementary File

Development of a short-form Swedish version of the Montreal Cognitive Assessment (s-MoCA-SWE): Protocol for a cross-sectional study

Tamar Abzhandadze<sup>1,2</sup>, Erik Lundström<sup>3</sup>, Dongni Buvarp<sup>1</sup>, Marie Eriksson<sup>4</sup>, Terence J. Quinn<sup>5</sup>, Katharina S. Sunnerhagen<sup>1,6</sup>.

<sup>1</sup>Institute of Neuroscience and Physiology, The Sahlgrenska Academy, University of Gothenburg, Gothenburg, Sweden.

<sup>2</sup>Department of Occupational Therapy and Physiotherapy, Sahlgrenska University Hospital, Gothenburg, Sweden.

<sup>3</sup>Department of Neuroscience, Neurology, Uppsala University, Akademiska Sjukhuset, Uppsala, Sweden.

<sup>4</sup>Department of Statistics, USBE, Umeå University, Umeå, Sweden.

<sup>5</sup>Institute of Cardiovascular and Medical Sciences, University of Glasgow, Glasgow, UK.

<sup>6</sup>Neurocare, Sahlgrenska University Hospital, Gothenburg, Sweden.

## Correspondence to:

Tamar Abzhandadze

Institute of Neuroscience and Physiology

Rehabilitation Medicine, University of Gothenburg

Per Dubbsgatan 14, fl. 3

413 45 Gothenburg, Sweden

E-mail: [tamar.abzhandadze@gu.se](mailto:tamar.abzhandadze@gu.se), [tamar.abzhandadze@vgregion.se](mailto:tamar.abzhandadze@vgregion.se)

**Supplementary Table 1.** Description of variables and their categories respective data set and in the merged dataset.

| Väststroke                                      | Väststroke: variable categories and coding | EFFECTS dataset         | EFFECTS: variable categories and coding                                                                                | Merged dataset: variable names and coding                                                                                                           |
|-------------------------------------------------|--------------------------------------------|-------------------------|------------------------------------------------------------------------------------------------------------------------|-----------------------------------------------------------------------------------------------------------------------------------------------------|
|                                                 |                                            |                         |                                                                                                                        | Cohorts, binary:<br>1 = Väststroke<br>2 = EFFECTS                                                                                                   |
| Sex                                             | Binary:<br>0 = female<br>1 = male          | Pat_Gender              | F = female<br>M = male                                                                                                 | Sex, binary:<br>1 = female<br>2 = male                                                                                                              |
| Age                                             | Scale: range                               | AGE                     | Numeric                                                                                                                | Age: numeric                                                                                                                                        |
| Living arrangement/living alone prior to stroke | Binary:<br>1 = no<br>2 = yes               | pat_Living_Arrangements | A = living alone<br>B = institutional living<br>C = other living arrangement<br>D = living with someone else           | Living arrangement prior to stroke, binary:<br>1 = lived alone (Väststroke = 2, EFFECTS = A)<br>2 = did not live alone (Väststroke = 1, EFFECTS ≥B) |
| Needing help/dependent prior to stroke          | Binary:<br>1 = no<br>2 = yes               | Stroke daily            | N = no<br>Y = yes<br><br><i>Note: "N" means that the patient did not require assistance with ADLs prior to stroke.</i> | Needs assistance with ADL before stroke, binary:<br>1 = no<br>2 = yes                                                                               |
| Diabetes                                        | Binary:<br>0 = no<br>1 = yes               | DIABETES                | N = no<br>Y = yes<br>U = unknown                                                                                       | Diabetes, nominal:<br>0 = no<br>1 = yes<br>2 = unknown                                                                                              |

|                     |                                                                                                  |                                                                                                                  |                                                                                                                                |                                                                                                                                                                 |
|---------------------|--------------------------------------------------------------------------------------------------|------------------------------------------------------------------------------------------------------------------|--------------------------------------------------------------------------------------------------------------------------------|-----------------------------------------------------------------------------------------------------------------------------------------------------------------|
| TIA prior to stroke | Binary:<br>0 = no<br>1 = yes                                                                     | PREV_Stroke_TIA<br><br><i>Note: In EFFECTS, previous TIA and previous ischemic stroke are not distinguished.</i> | N = no<br>Y = yes<br>U = unknown                                                                                               | Previous TIA or ischemic stroke, nominal:<br>0 = no<br>1 = yes<br>2 = unknown                                                                                   |
| Stroke diagnosis    | Nominal, 3 levels:<br>1 = I61<br>2 = I63<br>3 = I64                                              | Diagnosis                                                                                                        | 1 = ischemic stroke<br>2 = intracerebral haemorrhage<br>3 = non-stroke                                                         | Stroke diagnosis, nominal:<br>1 = I63<br>2 = I61<br>3 = I64                                                                                                     |
| Reperfusion         | 1 = both IVT and endovascular thrombectomy<br>2 = endovascular thrombectomy only<br>3 = IVT only | Thrombolysis_Trombectomy                                                                                         | 1 = both IVT and endovascular thrombectomy<br>2 = endovascular thrombectomy only<br>3 = IVT only                               | Reperfusion treatment, nominal:<br>1 = both IVT and endovascular thrombectomy<br>2 = endovascular thrombectomy only<br>3 = IVT only                             |
| NIHSS awareness     | Ordinal: range 0–3                                                                               | Stroke_NIHSS_1a                                                                                                  | 0 = alert<br>1 = not alert, but arousable with minimal stimulation<br>2 = not alert, requires repeated stimulation<br>3 = coma | NIHSS 1a, awareness, ordinal:<br>0 = alert<br>1 = not alert, but arousable with minimal stimulation<br>2 = not alert, requires repeated stimulation<br>3 = coma |
| NIHSS orientation   | Ordinal: range 0–2                                                                               | Stroke_NIHSS_1b                                                                                                  | 0 = answers both correctly<br>1 = answers one correctly<br>2 = answers both incorrectly                                        | NIHSS 1b, orientation, ordinal:<br>0 = answers both correctly<br>1 = answers one correctly<br>2 = answers both incorrectly                                      |

|                        |                    |                 |                                                                                                                              |                                                                                                                                                                    |
|------------------------|--------------------|-----------------|------------------------------------------------------------------------------------------------------------------------------|--------------------------------------------------------------------------------------------------------------------------------------------------------------------|
| NIHSS understanding    | Ordinal: range 0–2 | Stroke_NIHSS_1c | 0 = obeys both correctly<br>1 = obeys one correctly<br>2 = obeys both incorrectly                                            | NIHSS 1c, understanding, ordinal:<br>0 = obeys both correctly<br>1 = obeys one correctly<br>2 = obeys both incorrectly                                             |
| NIHSS eye movement     | Ordinal: range 0–2 | Stroke_NIHSS_2  | 0 = normal<br>1 = partial gaze palsy<br>2 = total gaze paresis                                                               | NIHSS 2, eye movement, ordinal:<br>0 = normal<br>1 = partial gaze palsy<br>2 = total gaze paresis                                                                  |
| NIHSS visual field     | Ordinal: range 0–3 | Stroke_NIHSS_3  | 0 = no visual field loss<br>1 = partial hemianopia<br>2 = complete hemianopia<br>3 = bilateral hemianopia                    | NIHSS 3, visual field, ordinal:<br>0 = no visual field loss<br>1 = partial hemianopia<br>2 = complete hemianopia<br>3 = bilateral hemianopia                       |
| NIHSS facial palsy     | Ordinal: range 0–3 | Stroke_NIHSS_4  | 0 = normal symmetrical movement<br>1 = minor paralysis<br>2 = partial paralysis<br>3 = complete paralysis                    | NIHSS 4, facial palsy, ordinal:<br>0 = normal symmetrical movement<br>1 = minor paralysis<br>2 = partial paralysis<br>3 = complete paralysis                       |
| NIHSS motor arm: right | Ordinal: range 0–4 | Stroke_NIHSS_7  | 0 = normal<br>1 = drift<br>2 = some effort against gravity<br>3 = no effort against gravity<br>4 = no effort against gravity | NIHSS 5, right motor arm, ordinal:<br>0 = normal<br>1 = drift<br>2 = some effort against gravity<br>3 = no effort against gravity<br>4 = no effort against gravity |

|                        |                    |                 |                                                                                                                              |                                                                                                                                                                    |
|------------------------|--------------------|-----------------|------------------------------------------------------------------------------------------------------------------------------|--------------------------------------------------------------------------------------------------------------------------------------------------------------------|
| NIHSS motor arm: left  | Ordinal: range 0–4 | Stroke_NIHSS_8  | 0 = normal<br>1 = drift<br>2 = some effort against gravity<br>3 = no effort against gravity<br>4 = no effort against gravity | NIHSS 6, left motor arm, ordinal:<br>0 = normal<br>1 = drift<br>2 = some effort against gravity<br>3 = no effort against gravity<br>4 = no effort against gravity  |
| NIHSS motor leg: right | Ordinal: range 0–4 | Stroke_NIHSS_5  | 0 = normal<br>1 = drift<br>2 = some effort against gravity<br>3 = no effort against gravity<br>4 = no effort against gravity | NIHSS 7, right motor leg, ordinal:<br>0 = normal<br>1 = drift<br>2 = some effort against gravity<br>3 = no effort against gravity<br>4 = no effort against gravity |
| NIHSS motor leg: left  | Ordinal: range 0–4 | Stroke_NIHSS_6  | 0 = normal<br>1 = drift<br>2 = some effort against gravity<br>3 = no effort against gravity<br>4 = no effort against gravity | NIHSS 8, left motor leg, ordinal:<br>0 = normal<br>1 = drift<br>2 = some effort against gravity<br>3 = no effort against gravity<br>4 = no effort against gravity  |
| NIHSS ataxia           | Ordinal: range 0–2 | Stroke_NIHSS_9  | 0 = no ataxia<br>1 = present in one limb<br>2 = present in two limbs                                                         | NIHSS 9, ataxia, ordinal:<br>0 = no ataxia<br>1 = present in one limb<br>2 = present in two limbs                                                                  |
| NIHSS sensory          | Ordinal: range 0–2 | Stroke_NIHSS_10 | 0 = normal<br>1 = mild-to-moderate sensory loss<br>2 = severe or total sensory loss                                          | NIHSS 10, sensory, ordinal:<br>0 = normal<br>1 = mild-to-moderate sensory loss<br>2 = severe or total sensory loss                                                 |

|                                                          |                                         |                        |                                                                                          |                                                                                                                            |
|----------------------------------------------------------|-----------------------------------------|------------------------|------------------------------------------------------------------------------------------|----------------------------------------------------------------------------------------------------------------------------|
| NIHSS language                                           | Ordinal: range 0–3                      | Stroke_NIHSS_11        | 0 = no aphasia<br>1 = mild-to-moderate aphasia<br>2 = severe aphasia<br>3 = mute         | NIHSS 11, language, ordinal:<br>0 = no aphasia<br>1 = mild-to-moderate aphasia<br>2 = severe aphasia<br>3 = mute           |
| NIHSS dysarthria                                         | Ordinal: range 0–2                      | Stroke_NIHSS_12        | 0 = normal<br>1 = mild-to-moderate dysarthria<br>2 = severe dysarthria<br>3 = untestable | NIHSS 12, dysarthria, ordinal:<br>0 = normal<br>1 = mild-to-moderate dysarthria<br>2 = severe dysarthria<br>3 = untestable |
| NIHSS neglect                                            | Ordinal: range 0–2                      | Stroke_NIHSS_13        | 0 = normal<br>1 = inattention to one modality<br>2 = severe hemi-inattention             | NIHSS 13, neglect, ordinal:<br>0 = normal<br>1 = inattention to one modality<br>2 = severe hemi-inattention                |
| NIHSS total score                                        | Ordinal: range 0–36                     | NIHSS                  | Ordinal: range 0–26                                                                      | NIHSS total score, ordinal: range 0–36                                                                                     |
| MoCA visuospatial/executive functions: 1A + cube + clock | Ordinal: range 0–5                      | MOCA_Base_Viso_exe     | Ordinal: range 0–5                                                                       | MoCA visuospatial/executive functions: trial + cube + clock, ordinal: range 0–5                                            |
| MoCA task: naming                                        | Ordinal: range 0–3                      | MOCA_Base_Name         | Ordinal: range 0–3                                                                       | MoCA: naming, ordinal: range 0–3                                                                                           |
| MoCA attention task: numbers forward and backward        | Ordinal: range 0–2                      | MOCA_Base_Att_fwd_back | Ordinal: range 0–2                                                                       | MoCA: digit span, ordinal: range 0–2                                                                                       |
| MoCA attention task: knock on A                          | Nominal:<br>0 = no point<br>1 = 1 point | MOCA_Base_Att_knock    | Nominal:<br>0 = no point<br>1 = 1 point                                                  | MoCA: tap on A, binary:<br>0 = no point<br>1 = 1 point                                                                     |
| MoCA attention task: subtraction 100 - 7                 | Ordinal: range 0–3                      | MOCA_Base_Att_subtract | Ordinal: range 0–3                                                                       | MoCA: serial 7, ordinal: range 0–3                                                                                         |

|                                                  |                                         |                       |                                         |                                                                                                                                                                                                                |
|--------------------------------------------------|-----------------------------------------|-----------------------|-----------------------------------------|----------------------------------------------------------------------------------------------------------------------------------------------------------------------------------------------------------------|
| MoCA language task: sentence repetition, 2       | Ordinal: range 0–2                      | MOCA_Base_Lang_rep    | Ordinal: range 0–2                      | MoCA: repetition, ordinal: range 0–2                                                                                                                                                                           |
| MoCA language task: fluency, F word              | Nominal:<br>0 = no point<br>1 = 1 point | MOCA_Base_Fluency     | Nominal:<br>0 = no point<br>1 = 1 point | MoCA: fluency, binary:<br>0 = no point<br>1 = 1 point                                                                                                                                                          |
| MoCA abstraction task: categorizing of two tasks | Ordinal: range 0–2                      | MOCA_Base_Abstraction | Ordinal: range 0–2                      | MoCA: abstraction, ordinal: range 0–2                                                                                                                                                                          |
| MoCA memory task: recall of five words           | Ordinal: range 0–5                      | MOCA_Base_Delay       | Ordinal: range 0–5                      | MoCA: delayed recall, ordinal: range 0–5                                                                                                                                                                       |
| MoCA orientation task: six questions             | Ordinal: range 0–6                      | MOCA_Base_Orientation | Ordinal: range 0–6                      | MoCA: orientation, ordinal: range 0–6                                                                                                                                                                          |
| MoCA total score                                 | Ordinal: range 1–30                     | MOCA_Base_Total       | Ordinal: range 1–30                     | MoCA total score, ordinal: range 1–30                                                                                                                                                                          |
| MoCA school ≤12 years, +1 point                  | Binary:<br>0 = no<br>1 = yes, +1 point  | MOCA_Education        | 0 = no<br>1 = yes, +1 point             | MoCA education, binary:<br>0 = no,<br>1 = yes, +1 point                                                                                                                                                        |
|                                                  |                                         |                       |                                         | A telephone version of the MoCA, ordinal: range 0–22<br><br>Aggregated score of the MoCA items: delayed recall, digit span, list letters, serial 7, sentence repetition, fluency, abstraction, and orientation |
|                                                  |                                         |                       |                                         | Short-form MoCA, ordinal: range 0–14<br><br>Aggregated score of the MoCA items: delayed recall, serial 7, and orientation                                                                                      |

|                        |                                                                                                                                                                                                                                                                                                                                                                                                       |                     |                                                                                                                            |                                                                                                                                                                                                                                                                        |
|------------------------|-------------------------------------------------------------------------------------------------------------------------------------------------------------------------------------------------------------------------------------------------------------------------------------------------------------------------------------------------------------------------------------------------------|---------------------|----------------------------------------------------------------------------------------------------------------------------|------------------------------------------------------------------------------------------------------------------------------------------------------------------------------------------------------------------------------------------------------------------------|
|                        |                                                                                                                                                                                                                                                                                                                                                                                                       |                     |                                                                                                                            | NINDS-CSN–MoCA, ordinal: range 0–12<br><br>Aggregated score of the MoCA items: delayed recall, fluency, and orientation                                                                                                                                                |
| Discharge destination* | Ordinal, 10 levels:<br>1 = own accommodation<br>2 = arranged accommodation<br>4 = another acute-care department<br>5 = geriatrics/rehabilitation<br>6 = deceased during treatment<br>7 = other acute-care department (e.g. the patient is resident in another country)<br>9 = not known<br>11 = still in hospital<br>12 = another stroke unit for aftercare<br>13 = health centre with emergency beds | Discharge residence | 1 = own home<br>2 = relatives' home<br>3 = residential home<br>4 = long-term NHS home<br>6 = another hospital<br>7 = other | Discharge destination, ordinal:<br>1 = own or relatives' home (Väststroke 1, EFFECTS 1 and 2)<br>2 = residential home (Väststroke 2, EFFECTS 3 and 4)<br>3 = other hospital (Väststroke 4, 5, 11, and 12, EFFECTS 6)<br>4 = other (Väststroke 7, 9, and 13, EFFECTS 7) |

Abbreviations: ADL, activity of daily living; IVT, intravenous thrombolysis; MoCA, Montreal Cognitive Assessment; NIHSS, National Institutes of Health Stroke Scale; NINDS-CSN, National Institute of Neurological Disorders and Stroke–Canadian Stroke Network; TIA, transient ischemic attack.



**Supplementary Table 2.** Patient baseline characteristics (template table)

|                                                     | Categories                              | Total sample<br>N = | Väststroke<br>N = | EFFECTS<br>N = |
|-----------------------------------------------------|-----------------------------------------|---------------------|-------------------|----------------|
| Sex, n (%)                                          | Male<br>Female                          |                     |                   |                |
| Age, y, mean (SD)                                   |                                         |                     |                   |                |
| Living arrangement, n (%)                           | Lives alone<br>Living with someone else |                     |                   |                |
| Education, 1 point for a maximum of 12 years, n (%) | Yes<br>No                               |                     |                   |                |
| Assistance with ADLs prior to stroke, n (%)         | No<br>Yes                               |                     |                   |                |
| Having diabetes, n (%)                              | No<br>Yes<br>Unknown                    |                     |                   |                |
| Previous TIA or ischemic stroke, n (%)              | No<br>Yes<br>Unknown                    |                     |                   |                |
| Stroke diagnosis, n (%)                             | I61<br>I63<br>I64                       |                     |                   |                |

|                              |                                                                                            |  |  |  |
|------------------------------|--------------------------------------------------------------------------------------------|--|--|--|
| Reperfusion treatment, n (%) | Both IVT and ET<br>ET only<br>IVT only                                                     |  |  |  |
| NIHSS, median (min–max)      |                                                                                            |  |  |  |
| MoCA, median (min–max)       |                                                                                            |  |  |  |
| Discharge destination, n (%) | Own or relatives' home<br>Residential or long-term<br>NHS home<br>Other hospitals<br>Other |  |  |  |

Note: The sum may vary due to missing data.

Abbreviations: ADL, activity of daily living; IVT, intravenous thrombolysis; IQR, interquartile range; MoCA, Montreal Cognitive Assessment; NIHSS, National Institutes of Health Stroke Scale; NHS, National Health System; SD, standard deviation; ET, endovascular thrombectomy; TIA, transient ischemic attack.

Variables with missing values, n (%):

**Supplementary Table 3.** Description of cognitive functions (template table).

|                                  |        | Total sample<br>N = | Väststroke<br>N = | EFFECTS<br>N = |
|----------------------------------|--------|---------------------|-------------------|----------------|
|                                  | Points | n (%)               | n (%)             | n (%)          |
| Visuospatial/executive functions | 0      |                     |                   |                |
|                                  | 1      |                     |                   |                |
|                                  | 2      |                     |                   |                |
|                                  | 3      |                     |                   |                |
|                                  | 4      |                     |                   |                |
|                                  | 5      |                     |                   |                |
| Naming three animals             | 0      |                     |                   |                |
|                                  | 1      |                     |                   |                |
|                                  | 2      |                     |                   |                |
|                                  | 3      |                     |                   |                |
| Digit span                       | 0      |                     |                   |                |
|                                  | 1      |                     |                   |                |
|                                  | 2      |                     |                   |                |
| Tap on A                         | 0      |                     |                   |                |
|                                  | 1      |                     |                   |                |
| Serial 7                         | 0      |                     |                   |                |
|                                  | 1      |                     |                   |                |

|                |   |  |  |  |
|----------------|---|--|--|--|
|                | 2 |  |  |  |
|                | 3 |  |  |  |
| Repetition     | 0 |  |  |  |
|                | 1 |  |  |  |
|                | 2 |  |  |  |
| Fluency        | 0 |  |  |  |
|                | 1 |  |  |  |
| Abstraction    | 0 |  |  |  |
|                | 1 |  |  |  |
|                | 2 |  |  |  |
| Delayed recall | 0 |  |  |  |
|                | 1 |  |  |  |
|                | 2 |  |  |  |
|                | 3 |  |  |  |
|                | 4 |  |  |  |
|                | 5 |  |  |  |
| Orientation    | 0 |  |  |  |
|                | 1 |  |  |  |
|                | 2 |  |  |  |
|                | 3 |  |  |  |
|                | 4 |  |  |  |

|                | 5            |  |  |  |
|----------------|--------------|--|--|--|
|                | 6            |  |  |  |
| MoCA score     | Median (IQR) |  |  |  |
| T-MoCA         | Median (IQR) |  |  |  |
| NINDS-CSN-MoCA | Median (IQR) |  |  |  |
| SF-MoCA        | Median (IQR) |  |  |  |

Abbreviations: IQR, interquartile range; MoCA, Montreal Cognitive Assessment (score range: 1–30); NINDS-CSN-MoCA, National Institute of Neurological Disorders and Stroke–Canadian Stroke Network MoCA (score range: 0–12); SF-MoCA, short-form MoCA (score range: 0–14); T-MoCA, a telephone version of the MoCA (score range: 0–22).

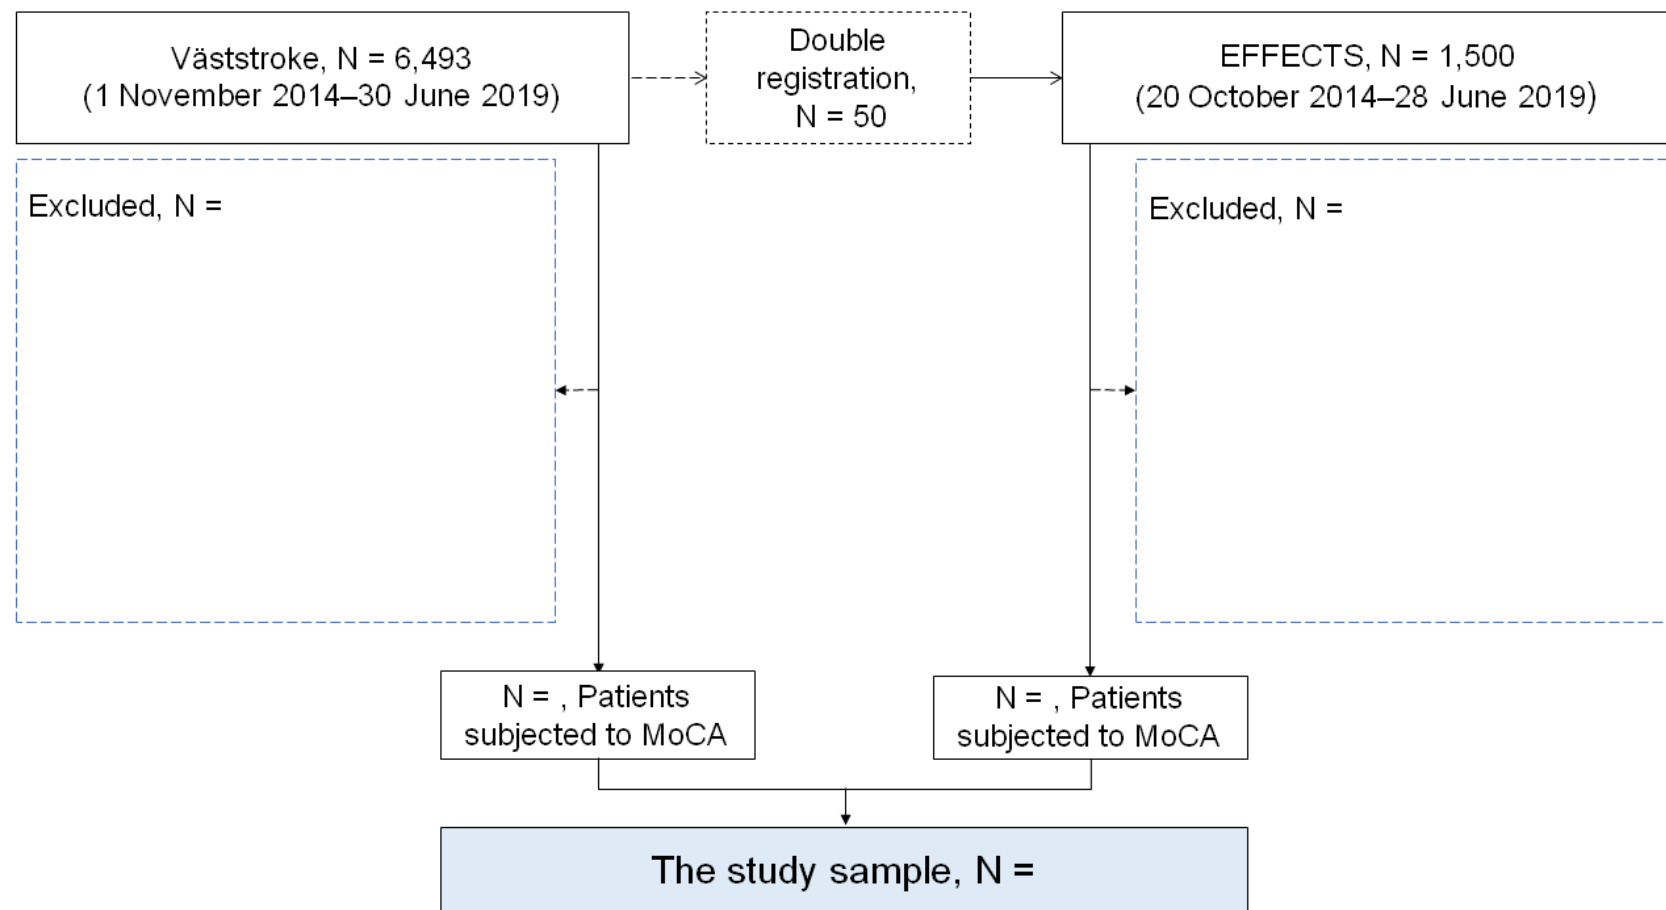

**Supplementary Figure.** Flowchart of patient selection (template diagram). Abbreviations: MoCA, the Montreal Cognitive Assessment; EFFECTS, Efficacy of Fluoxetine—a randomised Controlled Trial in Stroke.
